# Supplementary material
Source: HighWire-hosted journal article supplement (https://erj.ersjournals.com/content/49/6/1700007)
Supplement: inline-supplementary-material-1 [file inline-supplementary-material-1.pdf]

## SUPPLEMENTAL MATERIAL

**Table S1.** Differences in clinical parameters at baseline and during follow-up corrected for differences in PVR at baseline.

|                             | Monotherapy<br>(n=45) |               |              | Combination therapy<br>(n=35) |               |               | <i>P</i> -value for<br>baseline<br>difference<br>between groups | B <sup>1</sup> | 95% CI (B)            | <i>P</i> -value for<br>change<br>during<br>follow-up <sup>2</sup> |
|-----------------------------|-----------------------|---------------|--------------|-------------------------------|---------------|---------------|-----------------------------------------------------------------|----------------|-----------------------|-------------------------------------------------------------------|
| Variables                   | Baseline              | 1 year FU     | Mean change  | Baseline                      | 1 year FU     | Mean change   |                                                                 |                |                       |                                                                   |
| RHC                         |                       |               |              |                               |               |               |                                                                 |                |                       |                                                                   |
| mPAP, mmHg                  | 54 ± 11               | 53 ± 18       | -3 ± 10      | 56 ± 17                       | 43 ± 12       | -11 ± 13**    | 0.675                                                           | -6.7           | -11.9 to -1.5         | <b>0.012</b>                                                      |
| RAP, mmHg                   | 8 ± 4                 | 7 ± 4         | -1 ± 5       | 8 ± 5                         | 5 ± 4         | -3 ± 5***     | 0.761                                                           | -1.7           | -4.0 to 0.6           | 0.142                                                             |
| PVR, dyn·s·cm <sup>-5</sup> | 705 (485-998)         | 574 (347-867) | -162 ± 300** | 950 (624-1050)                | 393 (294-514) | -426 ± 344*** | <b>0.045</b>                                                    | -0.001         | -0.001 to -<br>0.0001 | <b>&lt;0.001</b>                                                  |
| PAWP, mmHg                  | 9 ± 4                 | 8 ± 4         | -1 ± 5       | 8 ± 3                         | 8 ± 4         | 0 ± 3         | 0.624                                                           | 0.6            | -1.3 to 2.6           | 0.533                                                             |
| CI, L/min/m <sup>2</sup>    | 2.6 ± 0,8             | 3.2 ± 1.2     | 0.7 ± 1.2**  | 2.3 ± 0,5                     | 3.4 ± 0.9     | 1.1 ± 0.9***  | <b>0.032</b>                                                    | 0.5            | -0.1 to 1.0           | 0.089                                                             |
| Heart rate, bpm             | 79 ± 18               | 79 ± 13       | -2 ± 17      | 80 ± 14                       | 74 ± 10       | -7 ± 14***    | 0.769                                                           | -4.5           | -11.7 to 2.8          | 0.223                                                             |
| SvO <sub>2</sub> , %        | 66 ± 7                | 66 ± 9        | 0 ± 8        | 63 ± 8                        | 70 ± 5        | 6 ± 7***      | 0.102                                                           | 6.3            | 2.5 to 10.1           | <b>0.001</b>                                                      |
| CMR variables               |                       |               |              |                               |               |               |                                                                 |                |                       |                                                                   |
| RVEDV, ml/m <sup>2</sup>    | 79 ± 20               | 82 ± 22       | 3 ± 16       | 81 ± 25                       | 76 ± 25       | -5 ± 16       | 0.703                                                           | -6.2           | -13.6 to 1.2          | 0.101                                                             |
| RVESV, ml/m <sup>2</sup>    | 51 ± 19               | 51 ± 23       | -1 ± 15      | 55 ± 25                       | 43 ± 22       | -13 ± 17***   | 0.381                                                           | -10.3          | -17.7 to -3.0         | <b>0.006</b>                                                      |
| RV mass, g/m <sup>2</sup>   | 51 ± 13               | 50 ± 15       | 0 ± 11       | 52 ± 15                       | 46 ± 14       | -6 ± 15**     | 0.759                                                           | -5.6           | -11.6 to 0.3          | 0.064                                                             |

|                            |                |               |              |                |              |                 |       |      |              |              |
|----------------------------|----------------|---------------|--------------|----------------|--------------|-----------------|-------|------|--------------|--------------|
| Relative RV wall thickness | 0.66 ± 0.18    | 0.64 ± 0.17   | -0.02 ± 0.16 | 0.69 ± 0.25    | 0.65 ± 0.28  | -0.04 ± 0.26    | 0.506 | 0.0  | -1 to 0.1    | 0.541        |
| RVEF, %                    | 36 ± 11        | 40 ± 14       | 4 ± 9**      | 34 ± 12        | 47 ± 13      | 13 ± 11***      | 0.319 | 8.1  | 3.6 to 12.7  | <b>0.001</b> |
| LVEDV, ml/m <sup>2</sup>   | 46 ± 13        | 51 ± 14       | 5 ± 8***     | 44 ± 10        | 53 ± 12      | 9 ± 12***       | 0.367 | 4.3  | -0.4 to 9.0  | 0.073        |
| LVESV, ml/m <sup>2</sup>   | 17 ± 8         | 19 ± 8        | 1 ± 7        | 18 ± 7         | 18 ± 6       | 0 ± 7           | 0.691 | -1.1 | -4.2 to 2.0  | 0.478        |
| LV mass, g/m <sup>2</sup>  | 55 ± 14        | 57 ± 11       | 2 ± 9*       | 54 ± 9         | 57 ± 11      | 4 ± 9*          | 0.749 | 2.3  | -1.8 to 6.3  | 0.269        |
| SV, ml/m <sup>2</sup>      | 29 ± 8         | 33 ± 11       | 4 ± 6***     | 26 ± 6         | 35 ± 7       | 9 ± 8***        | 0.074 | 5.0  | 1.6 to 8.4   | <b>0.004</b> |
| LVEF, %                    | 63 ± 10        | 66 ± 10       | 3 ± 10*      | 60 ± 10        | 66 ± 7       | 6 ± 10**        | 0.160 | 3.4  | -1.2 to 8.1  | 0.143        |
| <b>RV wall stress, kPA</b> | 12 ± 4         | 11 ± 4        | -1 ± 4       | 13 ± 5         | 9 ± 4        | -4 ± 5***       | 0.273 | -2.5 | -4.4 to -0.6 | <b>0.011</b> |
| <b>NT-proBNP, ng/L</b>     | 741 (159-2392) | 408 (98-1915) | -365 ± 1610* | 950 (624-1050) | 218 (87-572) | -1203 ± 1057*** | 0.121 | -0.1 | -0.2 to -0.0 | <b>0.045</b> |
| <b>6MWD, m</b>             | 418 ± 108      | 446 ± 115     | 27 ± 95      | 409 ± 119      | 475 ± 114    | 70 ± 75         | 0.948 | 33.0 | -8.8 to 74.8 | 0.120        |

Data are given as mean ± (SD) or median (IQR). <sup>1</sup>B represents the regression coefficient for the difference in variable change between groups with correction for baseline co-variates. <sup>2</sup>P-value for the difference in change in variables between groups during follow-up with correction for baseline co-variates.

Within group differences between baseline and follow-up variables are indicated by \*p <0.05; \*\*p < 0.01; \*\*\*p <0.001. NT-proBNP was measured in 71 patients and values were log-transformed before testing.

CMR = cardiac magnetic resonance imaging; CI = cardiac index; LVEDV = left ventricular end-diastolic volume; LVEF = left ventricular ejection fraction; LVESV = left ventricular end-systolic volume; LVSV = left ventricular stroke volume; mPAP = mean pulmonary artery pressure NT-proBNP = N-terminal pro-brain natriuretic peptide;; PAWP = pulmonary arterial wedge pressure; PVR = pulmonary vascular resistance; RAP = right atrial pressure; RVEDV = right ventricular end diastolic volume; RVEF = right ventricular ejection fraction; RVESV = right ventricular end-systolic volume, SvO<sub>2</sub>: mixed venous oxygen saturation.

**Table S2.** Differences in clinical parameters in all patients with unchanged therapy during 1 year follow-up.

| Variables                     | Monotherapy<br>(n=37) |               |              | Combination therapy<br>(n=32) |               |               | <i>P</i> -value for<br>baseline<br>difference<br>between groups | <i>B</i> <sup>1</sup> | 95% CI (B)            | <i>P</i> -value for<br>change<br>during<br>follow-up <sup>2</sup> |
|-------------------------------|-----------------------|---------------|--------------|-------------------------------|---------------|---------------|-----------------------------------------------------------------|-----------------------|-----------------------|-------------------------------------------------------------------|
|                               | Baseline              | 1 year FU     | Mean change  | Baseline                      | 1 year FU     | Mean change   |                                                                 |                       |                       |                                                                   |
|                               |                       |               |              |                               |               |               |                                                                 |                       |                       |                                                                   |
| RHC                           |                       |               |              |                               |               |               |                                                                 |                       |                       |                                                                   |
| mPAP, mmHg                    | 55 ± 12               | 54 ± 18       | -4 ± 9       | 55 ± 17                       | 42 ± 12       | -12 ± 13***   | 0.942                                                           | -8.1                  | -13.3 to -2.9         | <b>0.003</b>                                                      |
| RAP, mmHg                     | 8 ± 5                 | 7 ± 4         | -1 ± 4       | 8 ± 5                         | 5 ± 3         | -3 ± 5**      | 0.619                                                           | -2.3                  | -4.6 to 0.05          | 0.055                                                             |
| PVR, dyn·s·cm <sup>-5</sup>   | 705 (485-976)         | 589 (347-990) | -144 ± 263** | 940 (631-1048)                | 407 (299-515) | -439 ± 344*** | 0.078                                                           | -0.001                | -0.001 to -<br>0.0001 | <b>&lt;0.001</b>                                                  |
| PAWP, mmHg                    | 9 ± 4                 | 8 ± 4         | -1 ± 5       | 8 ± 3                         | 8 ± 3         | -1 ± 3        | 0.911                                                           | -0.1                  | -2.0 to 1.8           | 0.906                                                             |
| CI, L/min/m <sup>2</sup>      | 2.6 ± 0.7             | 3.1 ± 1.3     | 0.7 ± 1.2*   | 2.3 ± 0.5                     | 3.4 ± 0.9     | 1.1 ± 0.9***  | 0.089                                                           | 0.4                   | -0.1 to 0.9           | 0.145                                                             |
| Heart rate, bpm               | 79 ± 18               | 80 ± 13       | -1 ± 18      | 79 ± 13                       | 74 ± 10       | -7 ± 14**     | 0.978                                                           | -6.0                  | -13.7 to 1.8          | 0.128                                                             |
| SvO <sub>2</sub> , %          | 66 ± 8                | 67 ± 9        | 0 ± 8        | 64 ± 8                        | 70 ± 5        | 6 ± 7***      | 0.349                                                           | 5.6                   | 1.8 to 9.5            | <b>0.005</b>                                                      |
| CMR variables                 |                       |               |              |                               |               |               |                                                                 |                       |                       |                                                                   |
| RVEDV, ml/m <sup>2</sup>      | 78 ± 20               | 83 ± 22       | 5 ± 16       | 81 ± 26                       | 76 ± 24       | -5 ± 16       | 0.597                                                           | -10.2                 | -18.1 to -2.2         | <b>0.012</b>                                                      |
| RVESV, ml/m <sup>2</sup>      | 51 ± 20               | 53 ± 23       | 2 ± 15       | 55 ± 26                       | 42 ± 21       | -13 ± 17***   | 0.440                                                           | -15.1                 | -22.8 to -7.4         | <b>&lt;0.001</b>                                                  |
| RV mass, g/m <sup>2</sup>     | 52 ± 13               | 53 ± 16       | 1 ± 11       | 51 ± 15                       | 45 ± 14       | -6 ± 15*      | 0.896                                                           | -7.7                  | -14.0 to -1.4         | <b>0.018</b>                                                      |
| Relative RV wall<br>thickness | 0.68 ± 0.15           | 0.65 ± 0.18   | -0.03 ± 0.13 | 0.68 ± 0.25                   | 0.64 ± 0.27   | -0.04 ± 0.27  | 0.850                                                           | 0.0                   | -0.1 – 0.1            | 0.739                                                             |
| RVEF, %                       | 36 ± 12               | 38 ± 15       | 2 ± 8        | 35 ± 12                       | 47 ± 13       | 13 ± 11***    | 0.566                                                           | 11.0                  | 6.4 to 15.5           | <b>&lt;0.001</b>                                                  |
| LVEDV, ml/m <sup>2</sup>      | 46 ± 13               | 51 ± 15       | 5 ± 8***     | 44 ± 10                       | 53 ± 12       | 9 ± 12***     | 0.601                                                           | 3.8                   | -1.2 to 8.7           | 0.132                                                             |

|                                      |                |                |              |                     |              |                    |       |      |              |              |
|--------------------------------------|----------------|----------------|--------------|---------------------|--------------|--------------------|-------|------|--------------|--------------|
| LVESV, ml/m <sup>2</sup>             | 17 ± 8         | 19 ± 8         | 2 ± 7        | 18 ± 7              | 18 ± 6       | 0 ± 7              | 0.639 | -1.6 | -5.0 to 1.7  | 0.322        |
| LV mass, g/m <sup>2</sup>            | 56 ± 14        | 58 ± 12        | 2 ± 9        | 53 ± 9              | 57 ± 11      | 4 ± 9*             | 0.385 | 2.1  | -2.2 to 6.4  | 0.334        |
| SV, ml/m <sup>2</sup>                | 28 ± 8         | 32 ± 11        | 4 ± 6**      | 26 ± 6              | 35 ± 7       | 9 ± 8***           | 0.208 | 5.1  | 1.5 to 8.7   | <b>0.006</b> |
| LVEF, %                              | 63 ± 10        | 65 ± 11        | 3 ± 10       | 60 ± 10             | 66 ± 8       | 6 ± 10**           | 0.160 | 3.5  | -1.4 to 8.5  | 0.161        |
| <b>RV wall stress,</b><br><b>kPA</b> | 12 ± 4         | 11 ± 4         | 0 ± 3        | 13 ± 5              | 9 ± 4        | -4 ± 5***          | 0.304 | -3.3 | -5.3 to -1.5 | <b>0.001</b> |
| <b>NT-proBNP, ng/L</b>               | 606 (131-1898) | 478 (102-1988) | -261 ± 1669* | 1435 (536-<br>2854) | 198 (88-561) | -1176 ±<br>1099*** | 0.114 | -0.2 | -0.3 to -0.1 | <b>0.002</b> |
| <b>6MWD, m</b>                       | 411 ± 103      | 451 ± 97       | 31 ± 85**    | 419 ± 110           | 475 ± 114    | 69 ± 77***         | 0.754 | 38.4 | -3.1 to 80.0 | 0.069        |

Data are given as mean ± (SD) or median (IQR). <sup>1</sup>B represents the regression coefficient for the difference in variable change between groups without correction for baseline co-variates. <sup>2</sup>P-value for the difference in change in variables between groups during follow-up without correction for baseline co-variates. NT-proBNP values were log-transformed before testing. Within group differences between baseline and follow-up variables are indicated by \*p < 0.05; \*\*p < 0.01; \*\*\*p < 0.001.
